# Supplementary material for: Urbanization Altered Bacterial and Archaeal Composition in Tidal Freshwater Wetlands Near Washington DC, USA, and Buenos Aires, Argentina
Source: MDPI journal article supplement (doi:10.3390/microorganisms7030072), 2019-03-06
Supplement: s1 [file s1]

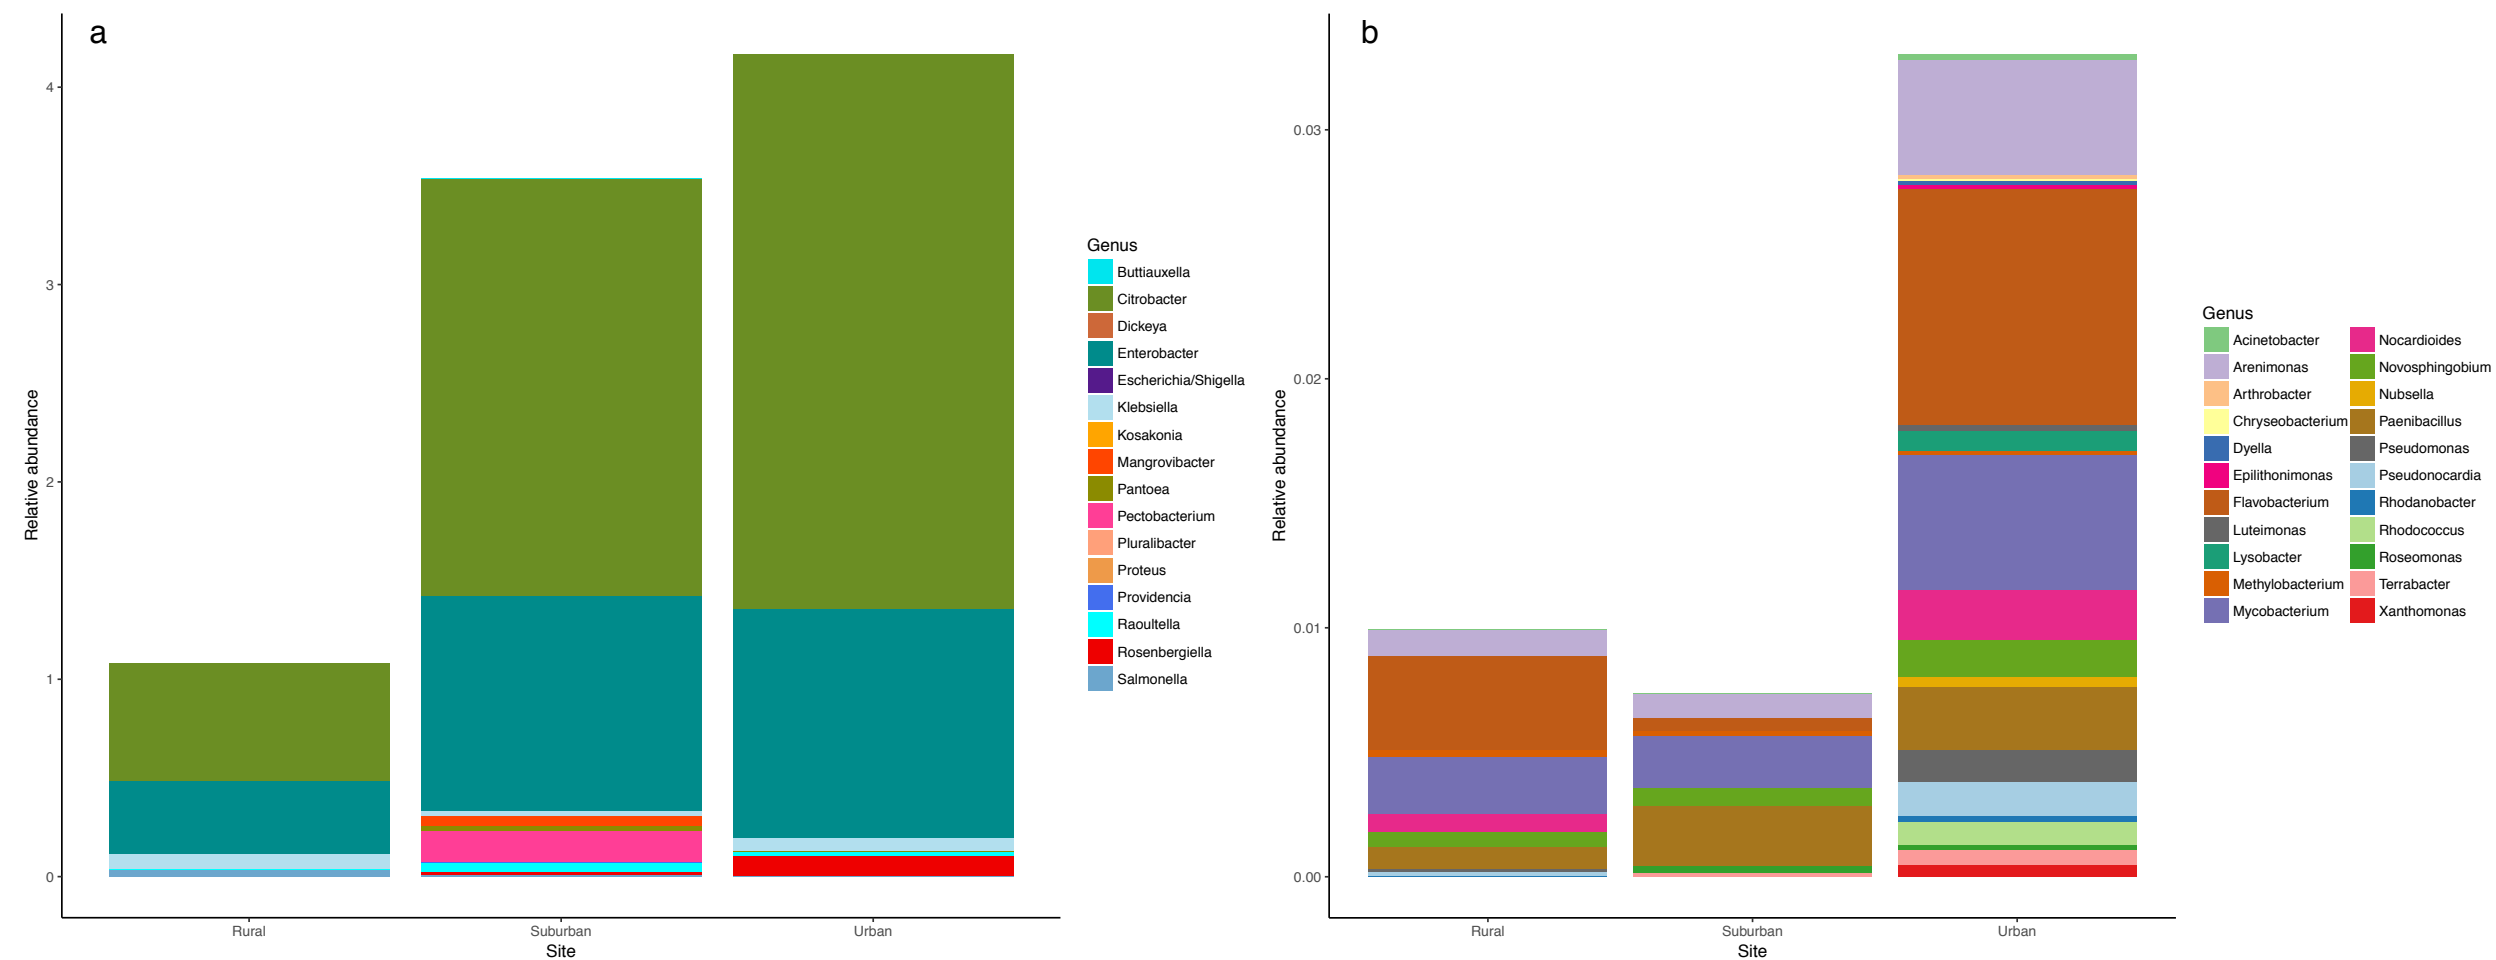

**Figure S1:** Relative abundance of bacteria of the family Enterobacteriaceae in Buenos Aires (**a**) and bacterial genus capable of PAH degradation in Washington D.C. (**b**)
