# Supplementary material for: Urbanization Altered Bacterial and Archaeal Composition in Tidal Freshwater Wetlands Near Washington DC, USA, and Buenos Aires, Argentina
Source: MDPI journal article supplement (doi:10.3390/microorganisms7030072), 2019-03-06
Supplement: s1 [file s1]

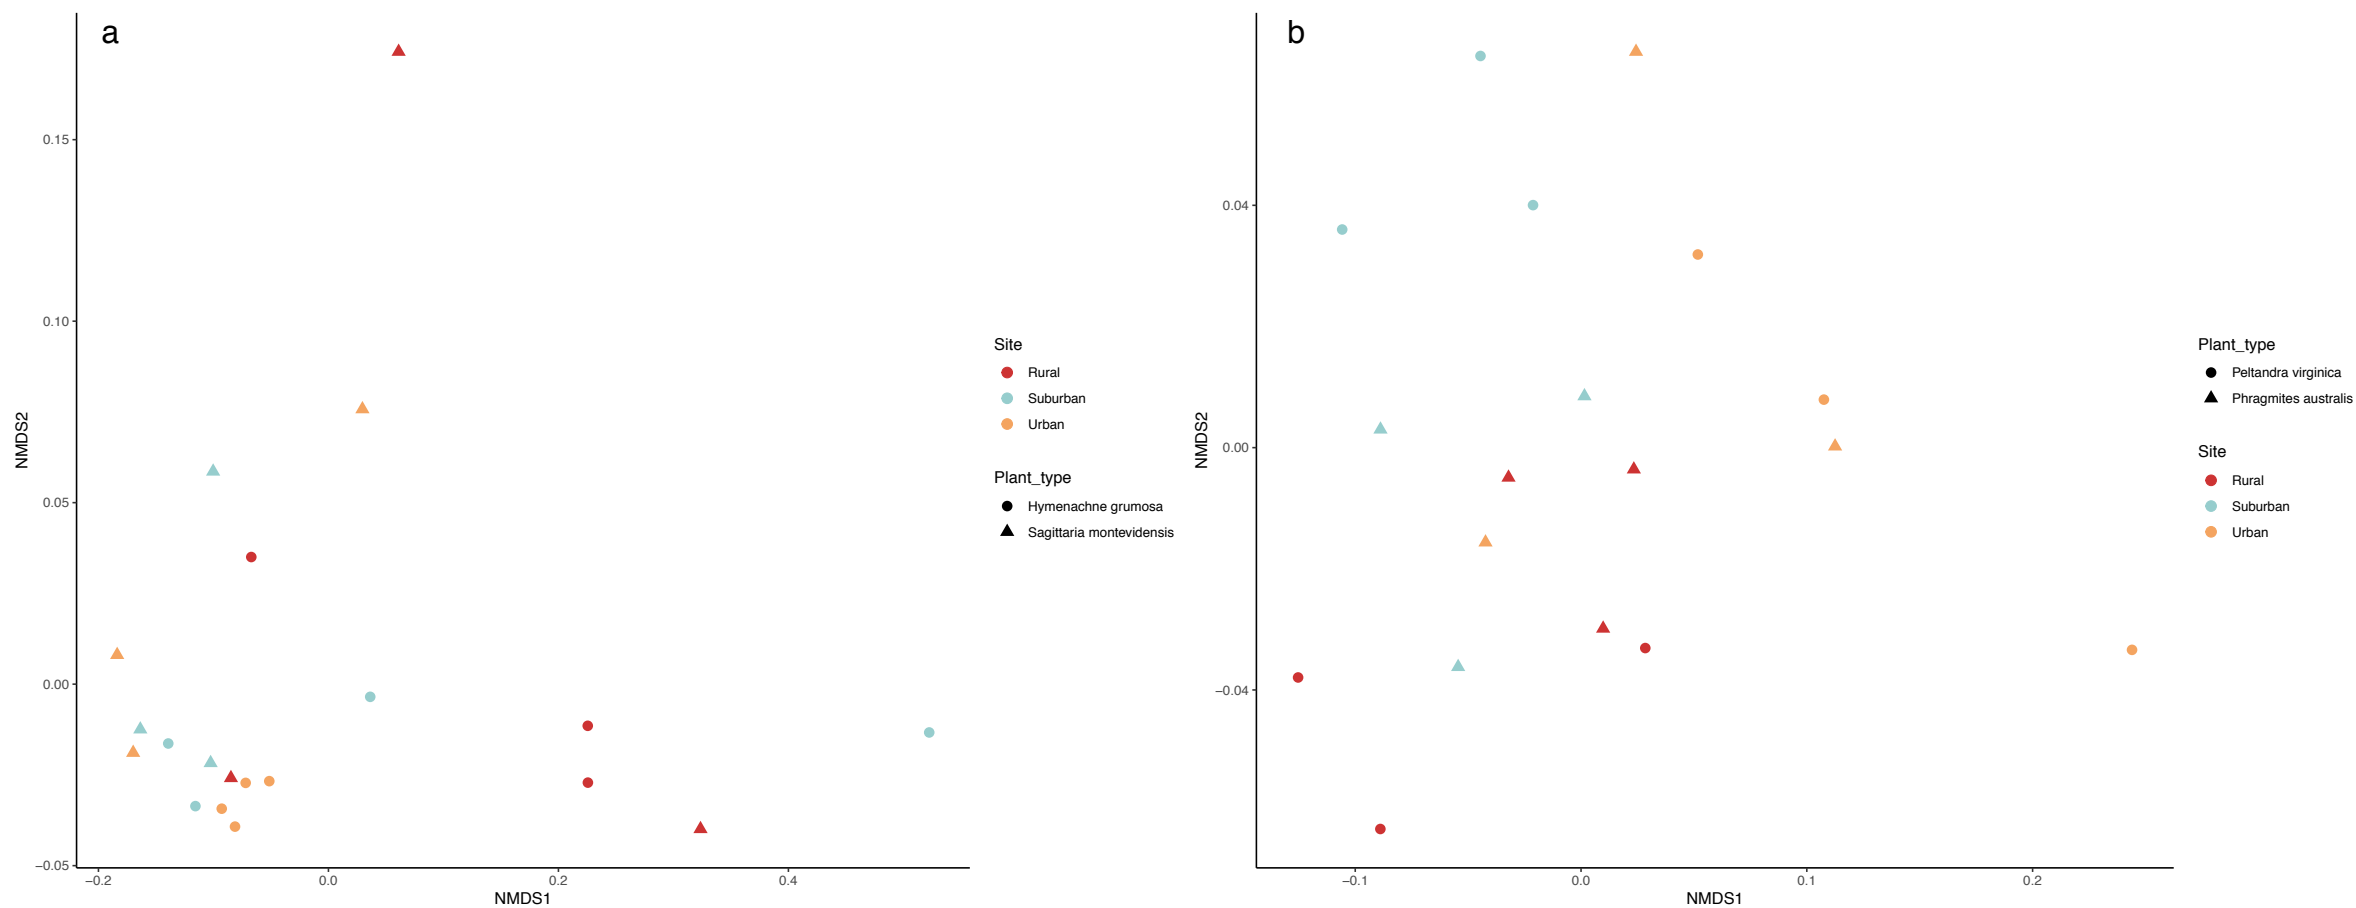

**Figure S2:** Non-metric multidimensional scaling ordination (NMDS) of KEGG metabolic profiles of the microbial communities. Each point represents a sample with colors corresponding to sites, and shapes to plant species.
