# Supplementary material for: Urbanization Altered Bacterial and Archaeal Composition in Tidal Freshwater Wetlands Near Washington DC, USA, and Buenos Aires, Argentina
Source: MDPI journal article supplement (doi:10.3390/microorganisms7030072), 2019-03-06
Supplement: s1 [file s1]

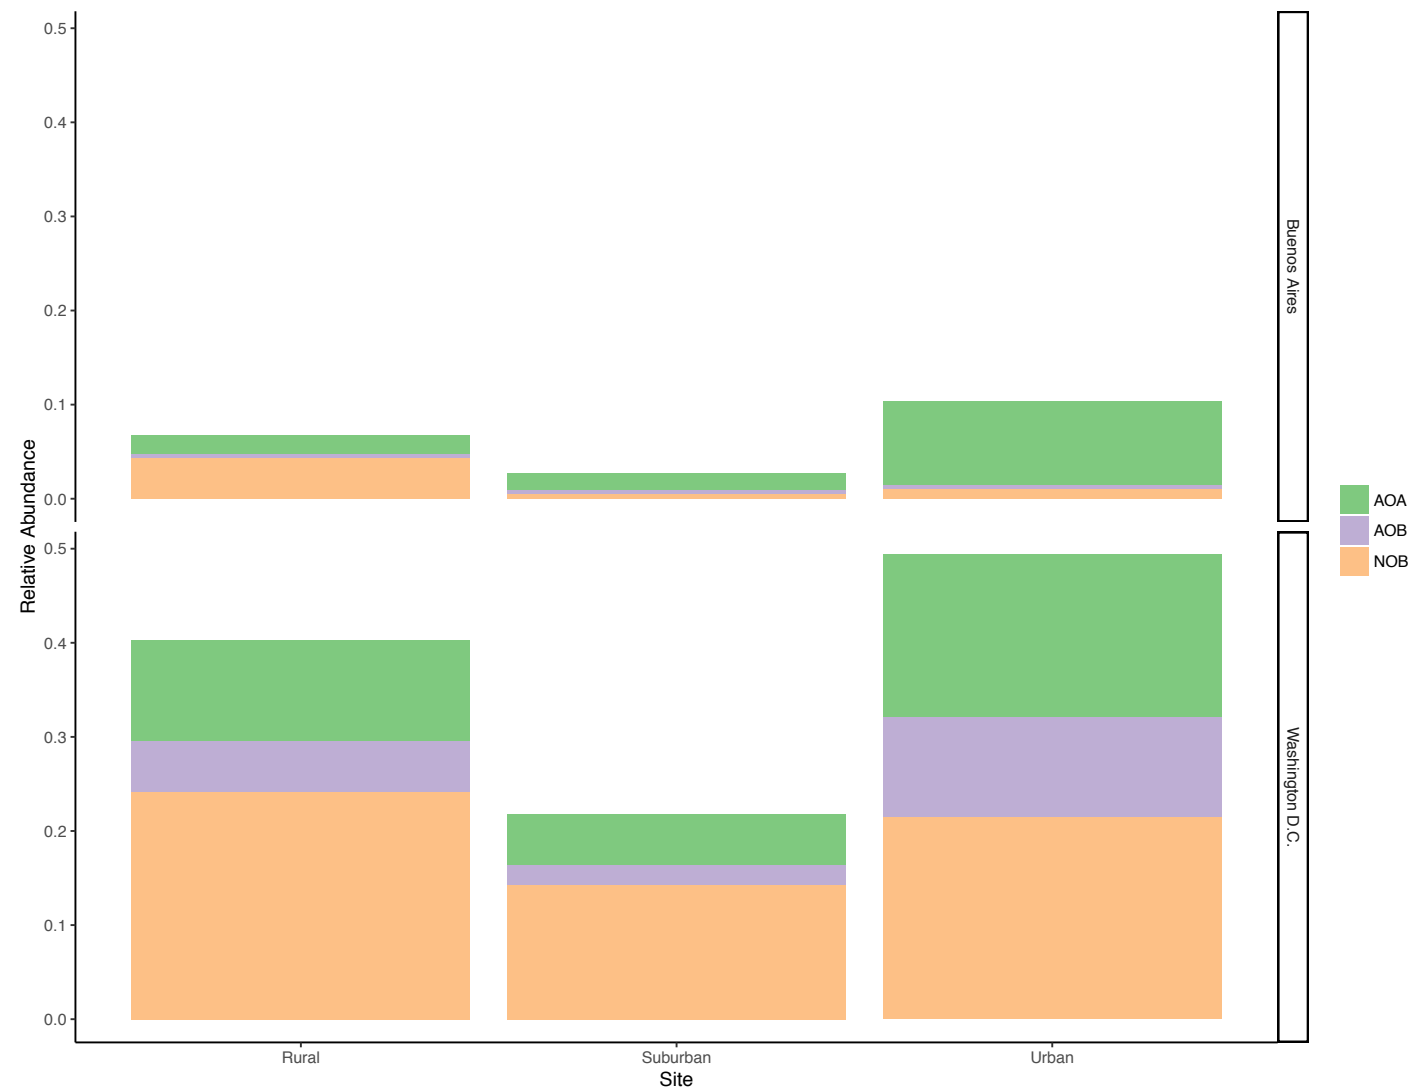

**Figure 3:** Relative abundance of ammonia-oxidizing archaea (AOA), ammonia-oxidizing bacteria (AOB) and nitrite oxidizing bacteria (NOB) along the urban gradient in Buenos Aires and Washington D.C.
